# Supplementary material for: Rh-catalyzed WO3 with anomalous humidity dependence of gas sensing characteristics
Source: Royal Society of Chemistry journal article supplement (doi:10.1039/c4ra06654e), 2014-01-01
Supplement: c4ra06654e1.pdf [file c4ra06654e1.pdf]

## Supporting Information

### Rh-Catalyzed WO<sub>3</sub> with Anomalous Humidity Dependence of Gas Sensing Characteristics

*Kwon-Il Choi, Su Jin Hwang, Zhengfei Dai, Yun Chan Kang, and Jong-Heun Lee\**

Department of Materials Science and Engineering, Korea University,  
Seoul 136-713, Republic of Korea,

\*Email: [jongheun@korea.ac.kr](mailto:jongheun@korea.ac.kr); Fax: +82 2 928 3584; Tel: +82 2 3290 3282

**Figure S1.** Kwon-Il Choi *et al.*

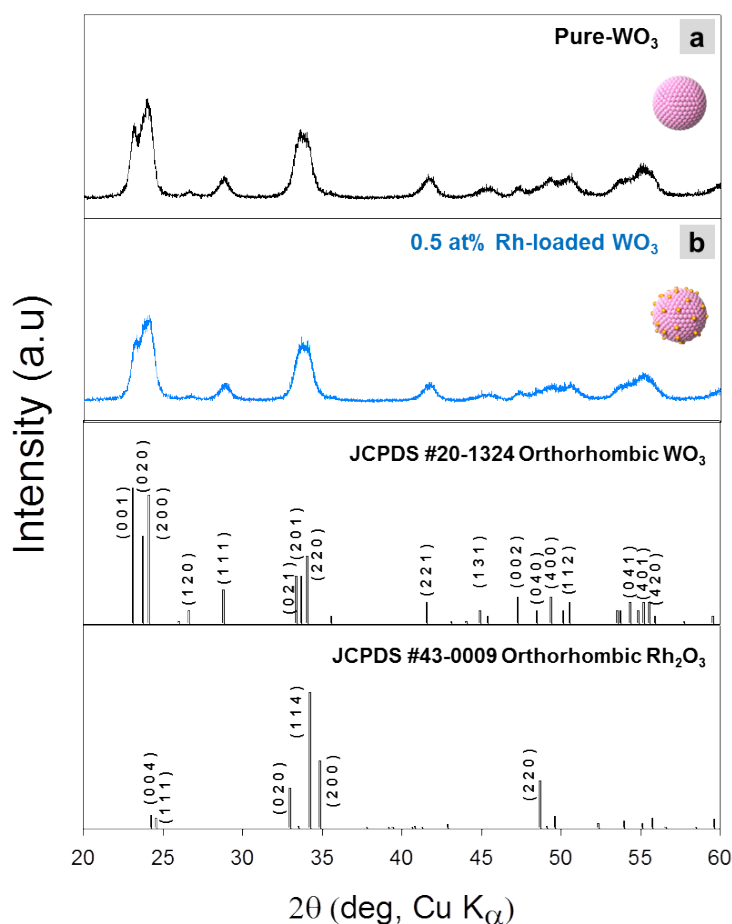

**Figure S1.** X-ray diffraction (XRD) patterns for the as-synthesized WO<sub>3</sub> HWs and Rh-loaded WO<sub>3</sub> HWs.

Figure S2. Kwon-Il Choi *et al.*

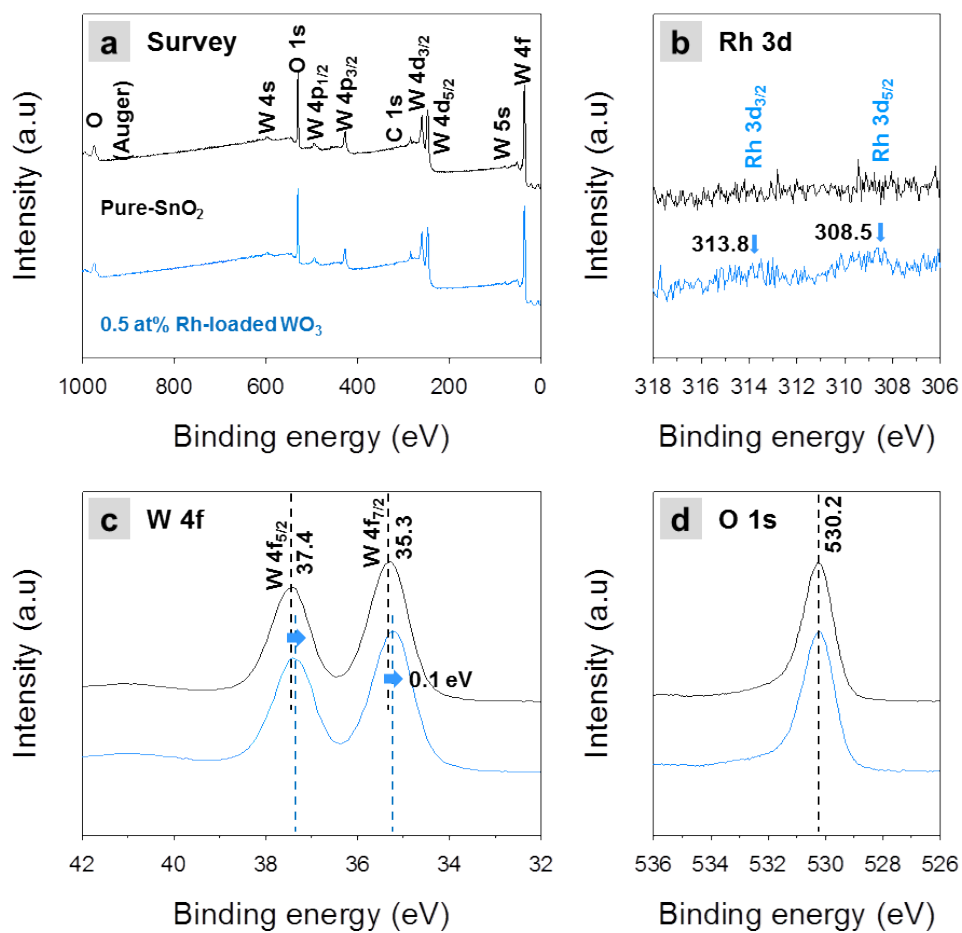

**Figure S2.** XPS spectra of  $\text{WO}_3$  and Rh-loaded  $\text{WO}_3$  HWs, respectively. (a) Survey scanning energy spectra. (b) Rh 3d binding energy spectra. (c) W 4f binding energy spectra. (d) O 1s core level spectra.

Figure S3. Kwon-II Choi *et al.*

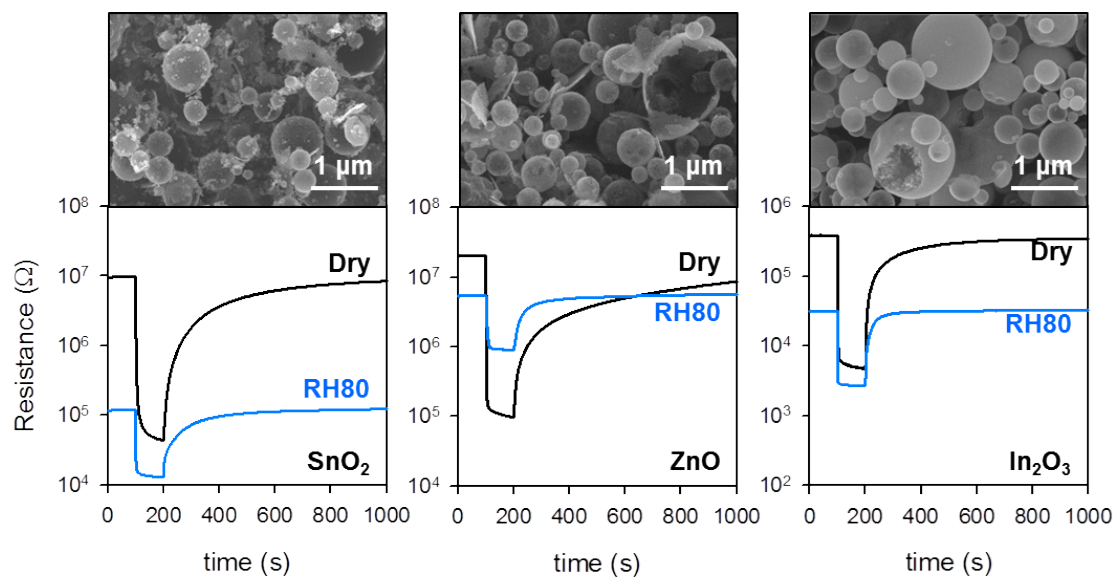

**Figure S3.** SEM images and sensing behaviors of SnO<sub>2</sub>, ZnO, and In<sub>2</sub>O<sub>3</sub> prepared by spray pyrolysis to 10 ppm acetone gas at 400 °C in the dry and humid atmosphere (RH 80%).

Figure S4. Kwon-II Choi *et al.*

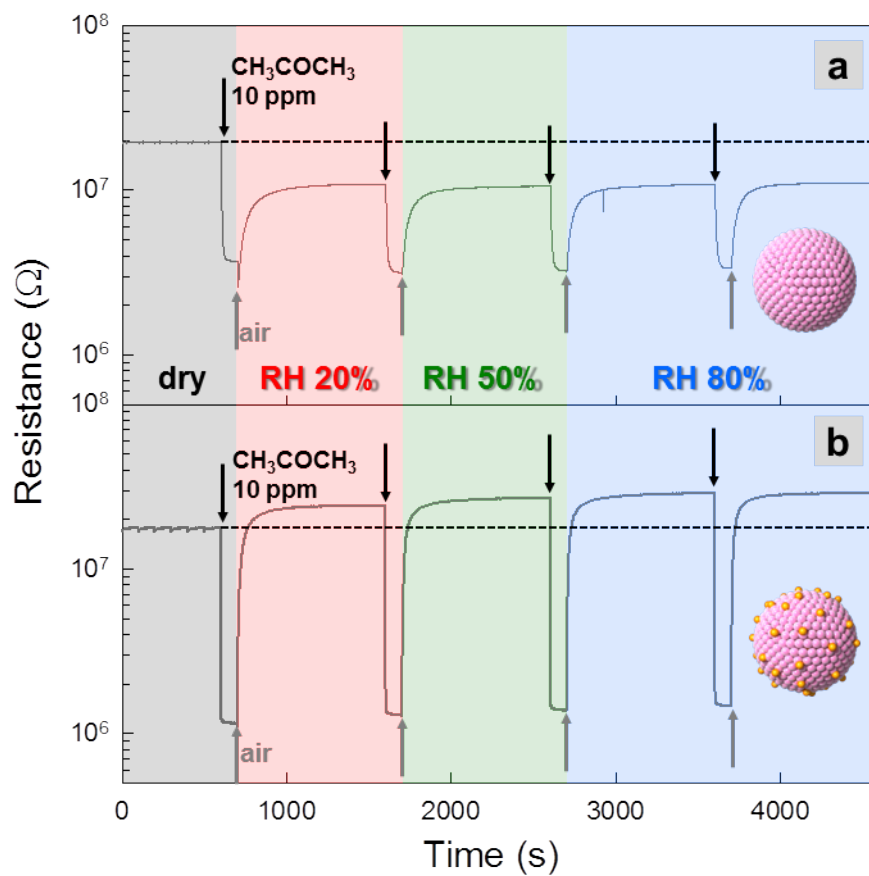

**Figure S4.** Sensing transients of (a) pure and (b) 0.5 at% Rh-loaded WO<sub>3</sub> HWs toward 10 ppm acetone with increasing ambient humidity (0-80% RH).

Figure S5. Kwon-II Choi *et al.*

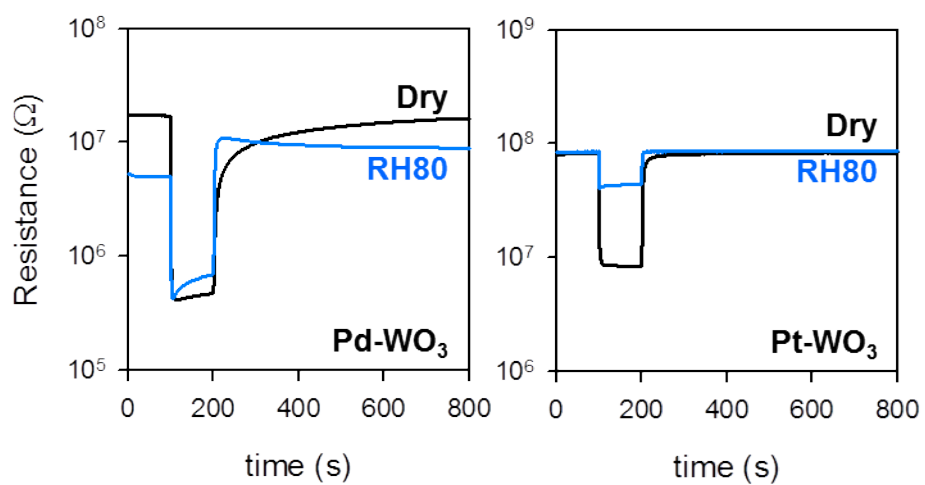

**Figure S5.** Sensing behaviors of Pd and Pt-loaded WO<sub>3</sub> prepared by spray pyrolysis to 10 ppm acetone gas at 400 °C in the dry and humid atmosphere (RH 80%).

Figure S6. Kwon-Il Choi *et al.*

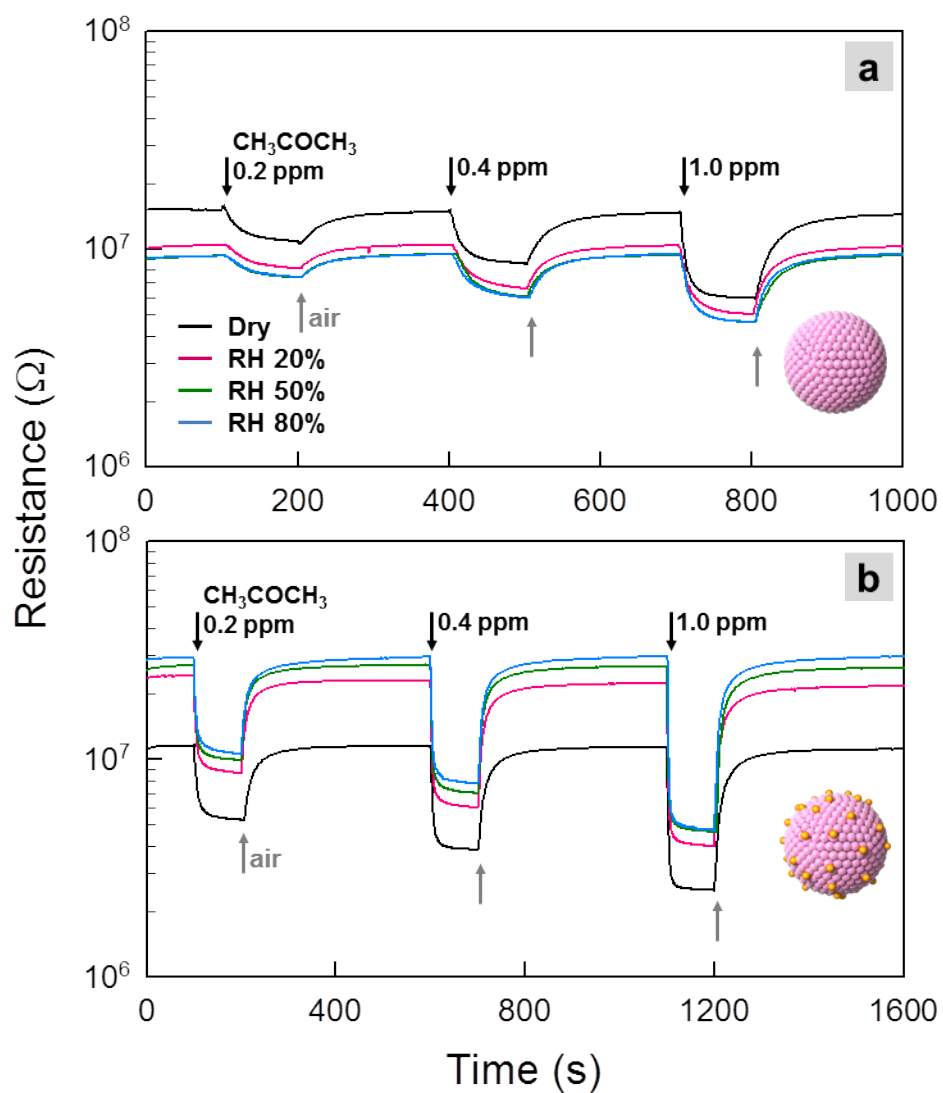

**Figure S6.** Acetone sensing transients of (a) pure and (b) 0.5 at% Rh-loaded WO<sub>3</sub> HWs to 0.2-1.0 ppm at 400 °C in dry and humid (RH of 20, 50 and 80%) atmospheres.

Figure S7. Kwon-II Choi *et al.*

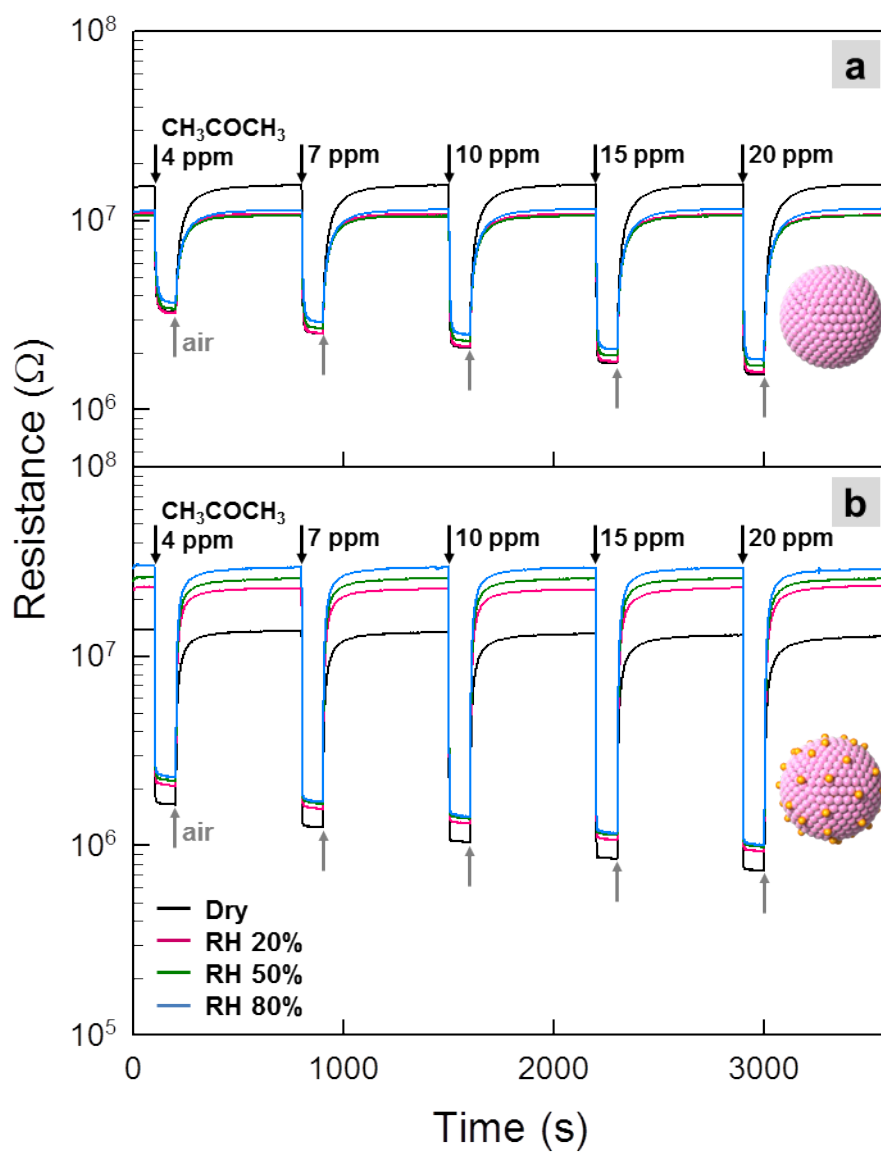

**Figure S7.** Acetone sensing transients of (a) pure and (b) 0.5 at% Rh-loaded WO<sub>3</sub> HWs to 4-20 ppm at 400 °C in dry and humid (RH of 20, 50 and 80%) atmospheres.

**Table S1. Kwon-II Choi et al.**

**Table S1.** The detection limit for diagnosis of diseases, gas concentrations for measurement, and  $R_a/R_g$  of pure  $WO_3$  and Rh-loaded  $WO_3$  hollow spheres at 400 °C in 80% RH.

|                                                     | Diagnosis conc.         | Measured conc. | $R_a/R_g$<br>Pure $WO_3$ | $R_a/R_g$<br>Rh-loaded $WO_3$ |
|-----------------------------------------------------|-------------------------|----------------|--------------------------|-------------------------------|
| <b>CH<sub>3</sub>COCH<sub>3</sub></b><br>(Diabetes) | 1.8 ppm <sup>[1]</sup>  | 4 ppm          | 3.07                     | 13.1                          |
| <b>CO</b><br>(Bronchiectasis)                       | 8.6 ppm <sup>[2]</sup>  | 20 ppm         | 1.15                     | 2.28                          |
| <b>NH<sub>3</sub></b><br>(Renal failure)            | 14.7 ppm <sup>[3]</sup> | 20 ppm         | 3.46                     | 3.46                          |
| <b>H<sub>2</sub>S</b><br>(Halitosis)                | 0.5 ppm <sup>[4]</sup>  | 1 ppm          | 4.30                     | 7.27                          |
| <b>Benzene</b><br>(Lung cancer)                     | 10 ppb <sup>[5]</sup>   | 20 ppb         | 1.11                     | 1.78                          |
| <b>Toluene</b><br>(Lung cancer)                     | 10 ppb <sup>[5]</sup>   | 20 ppb         | 1.22                     | 1.61                          |
| <b>Xylene</b><br>(Lung cancer)                      | 10 ppb <sup>[5]</sup>   | 20 ppb         | 1.34                     | 1.49                          |
| <b>NO</b><br>(Asthma)                               | 100 ppb <sup>[6]</sup>  | 200 ppb        | 1.22                     | 1.40                          |

## Reference

1. C. Deng, J. Zhang, X. Yu, W. Zhang, X. Zhang, *J. Chromatogr. B*, 2004, **810**, 269-275.
2. I. Horvath, S. Loukides, T. Wodehouse, S. Kharitonov, P. Cole and P. Barnes, *Thorax*, 1998, **53**, 867-870.
3. S. Davis, P. Spanel, D. Smith, *Kidney Int.* 1997, **52**, 223-228.
4. F. L. Suarez, J. K. Furne, J. Springfield and M. D. Levitt, *J. Dent. Res.*, 2000, **79**, 1773-1777.
5. D. Poli, P. Carbognani, M. Corradi, M. Goldoni, O. Acampa, B. Balbi, L. Bianchi, M. Rusca and A. Mutti, *Respir. Res.*, 2005, **6**, 71.
6. S. A. Kharitonov and P. J. Barnes, *Biomarkers*, 2002, **7**, 1-32.
